# Supplementary material for: The Novel Atypical Antipsychotic Lurasidone Affects Cytochrome P450 Expression in the Liver and Peripheral Blood Lymphocytes
Source: MDPI journal article supplement (doi:10.3390/ijms242316796), 2023-11-27

## CYP1A

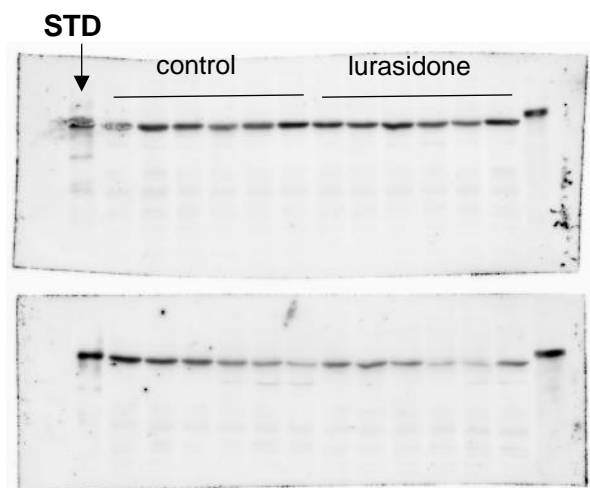

## $\beta$ -actin

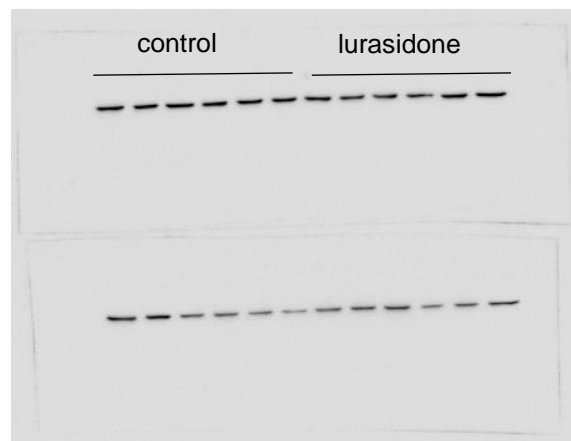

## CYP2A

### protein standard

75 kDa  
50 kDa  
37 kDa  
25 kDa

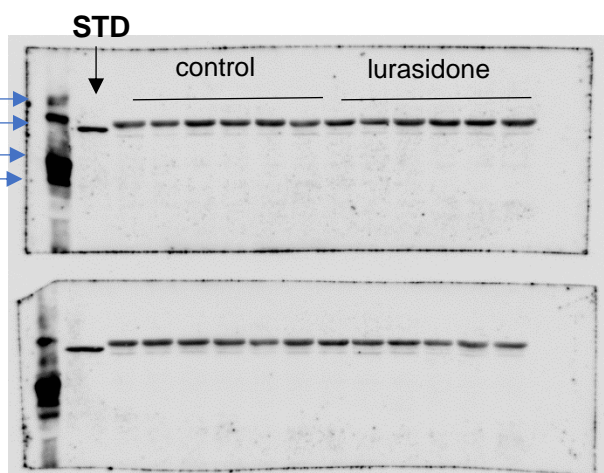

## $\beta$ -actin

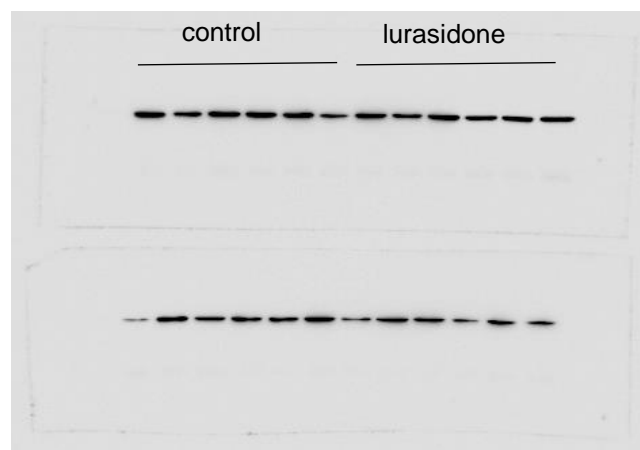

## CYP2B

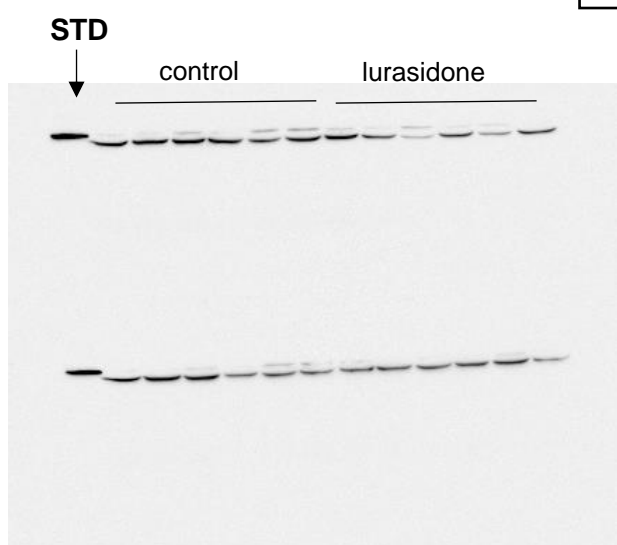

## $\beta$ -actin

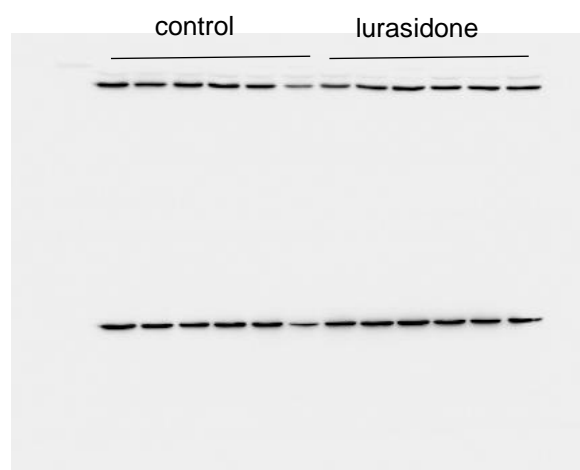

## CYP2C11

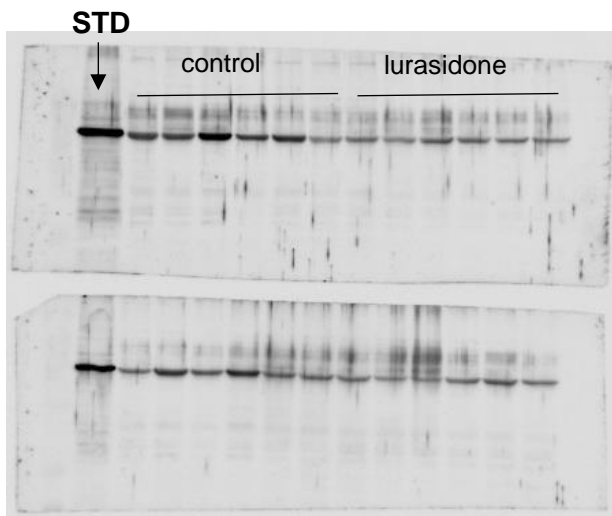

## $\beta$ -actin

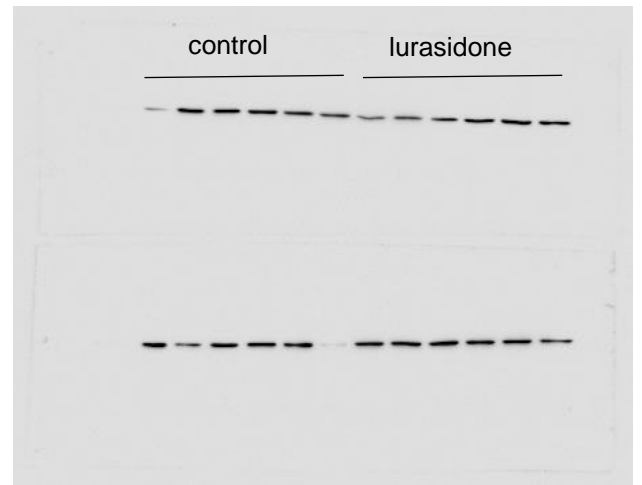

## CYP2E1

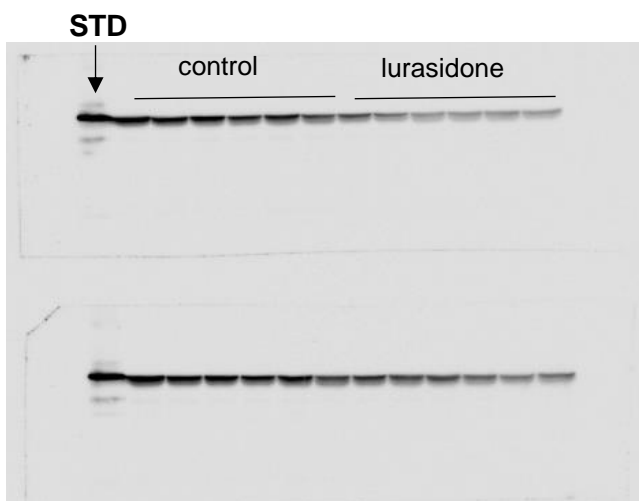

## $\beta$ -actin

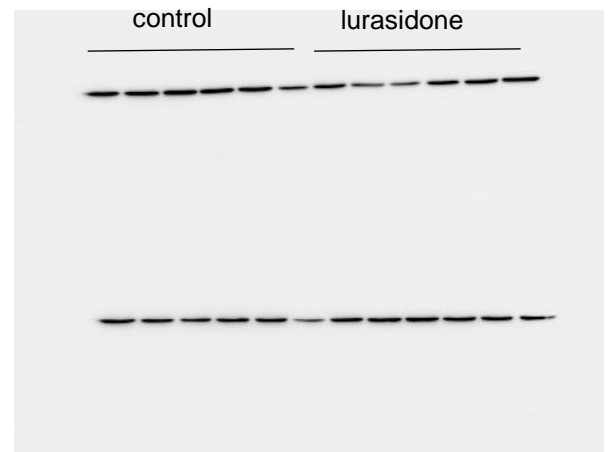

## CYP3A1

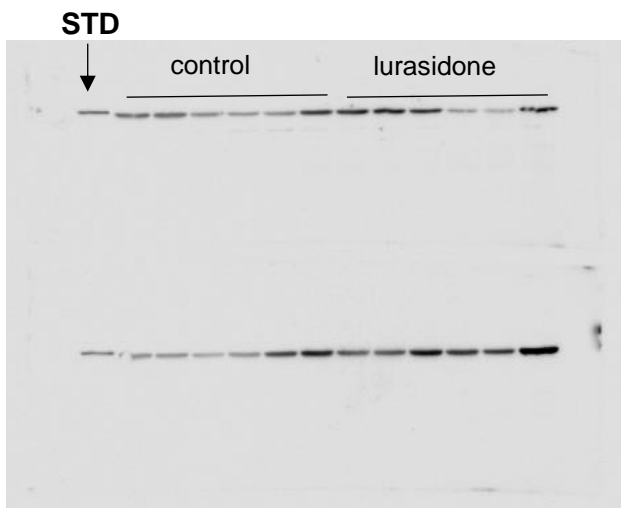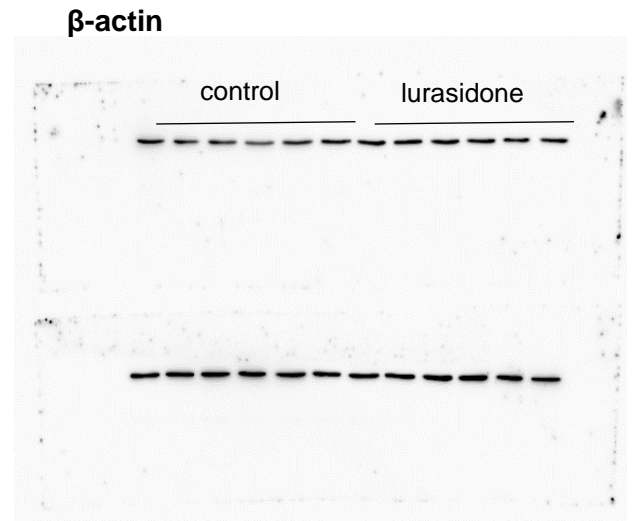

## CYP3A2

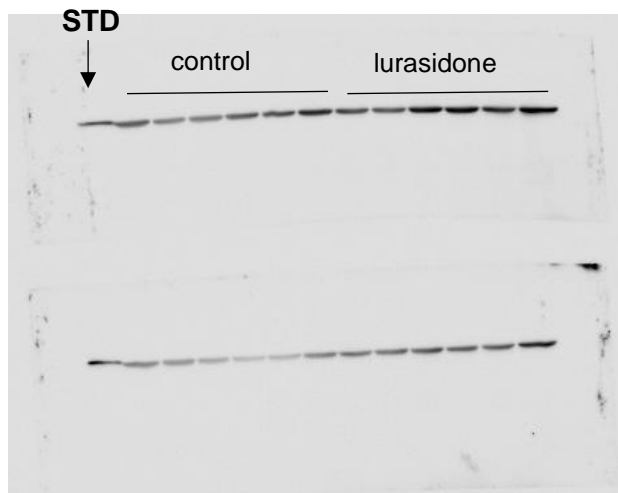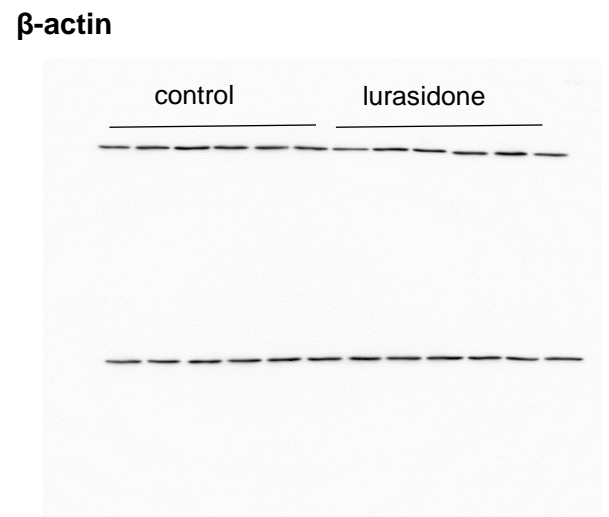

Supplement: s1 [file s1]
